# Supplementary material for: Cholesterol Dietary Intake and Tumour Cell Metabolism Drive Early Epithelial Tumorigenesis
Source: Preprints.org preprint supplement (doi:10.20944/preprints202405.0400.v1), 2024-05-07
Supplement: Supplementary file 1 [file supplementary]

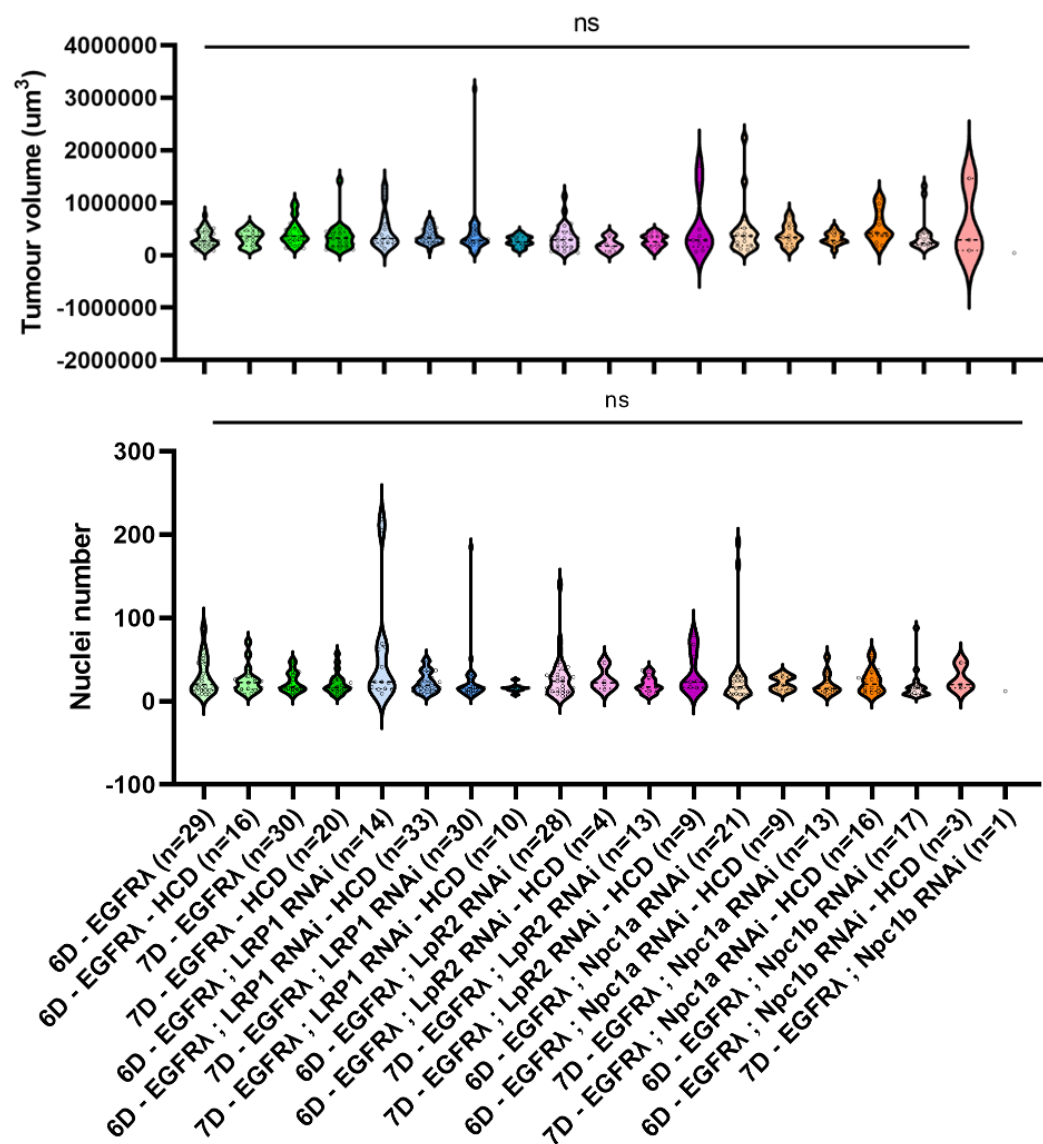

**Figure S1.** Cholesterol dietary intake and/or cholesterol metabolism has no effect on tumour phenotype itself. Increasing dietary cholesterol and/or downregulation of cholesterol import, intracellular trafficking or storage has no effect on the volume and the number of cells of extra-epithelial tumours.
